# Supplementary material for: Mercury ion–DNA specificity triggers a distinctive photoluminescence depression in organic semiconductor probes guided with a thymine-rich oligonucleotide sequence
Source: Royal Society of Chemistry journal article supplement (doi:10.1039/c8nr03879a), 2018-01-01
Supplement: c8nr03879a3.pdf [file c8nr03879a3.pdf]

Electronic Supporting Information

## Mercury Ion-DNA Specificity Triggers a Distinctive Photoluminescence Depression in Organic Semiconductor Probes Guided with Thymine-Rich Oligonucleotide Sequence.

Jietao Huang<sup>a,1</sup>, Jin Hyuk Park<sup>b,1</sup>, Seung Hyuk Back<sup>c</sup>, Yuhui Feng<sup>d</sup>, Chunzhi Cui<sup>a,\*</sup>, Long Yi Jin<sup>a,\*</sup>, and Dong June Ahn<sup>b,c,\*</sup>

In this Supplementary Information, the following results are presented:

**Fig. S1.** A scanning electron microscopy (SEM) image of the Alq<sub>3</sub> particles prepared in pure deionized (D.I.) water not containing single-strand DNA (ssDNA).

**Fig. S2.** Quantitative green pixel values of visible PL images of ssDNA-guided Alq<sub>3</sub> rods after interaction with mercury ions [Fig. 2(a)].

**Fig. S3.** Quantitative PL graph of log-intensity versus time and fitting kinetic data using Equation (2).

**Fig. S4.** The distinctive depression of luminescence of three different Alq<sub>3</sub> particles with thymine-rich ssDNA before and after interaction with mercury ions

**Fig. S5.** Luminescence response of Alq<sub>3</sub> particles with three different sequences of ssDNA: (a) PL spectra and (b) quantitative PL intensities.

**Fig. S6.** PL spectra of the ssDNA-guided Alq<sub>3</sub> microrods incubated in D.I. water at 50°C for 30 min and then returned to room temperature.

**Mov. S1.** Phenomena of a real-time reduction in the luminescence of ssDNA-guided Alq<sub>3</sub> rods for 60 min before exposure to mercury solutions

**Mov. S2.** Phenomena of a real-time reduction in the luminescence of ssDNA-guided Alq<sub>3</sub> rods for 60 min after exposure to mercury solutions.

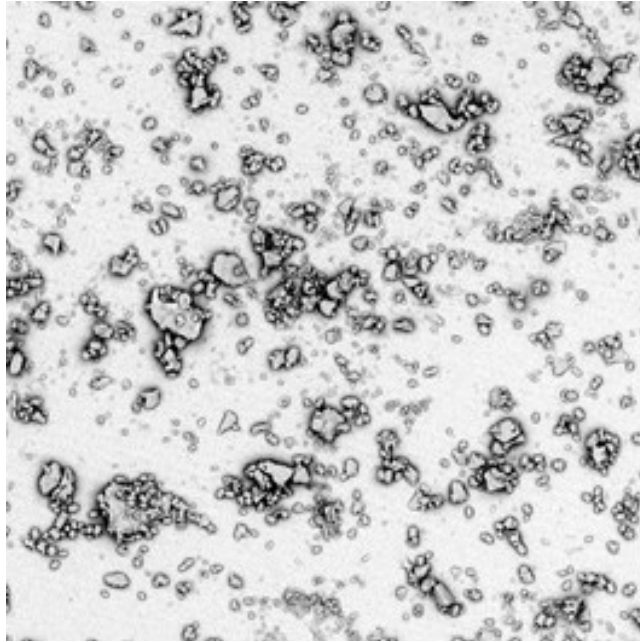

**Fig. S1.** A scanning electron microscopy (SEM) image of the Alq<sub>3</sub> particles prepared in pure deionized (D.I.) water not containing single-strand DNA (ssDNA). An irregular macroscopic shape of the Alq<sub>3</sub> particles was observed.

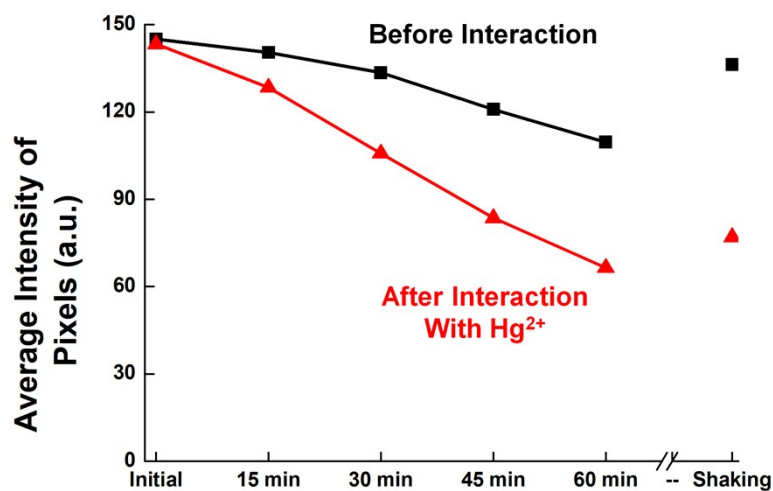

**Fig. S2.** Quantitative green pixel values of visible PL images of ssDNA-guided Alq<sub>3</sub> rods after interaction with mercury ions [Figure 2(a)]. This pixel values were measured with Adobe Photoshop CS5 program. Average intensity of ssDNA-guided Alq<sub>3</sub> rods slightly decreased before exposure to mercury (II) chloride solution. Of note, the intensity of samples after exposure to a mercury (II) chloride solution continuously drastically decreased.

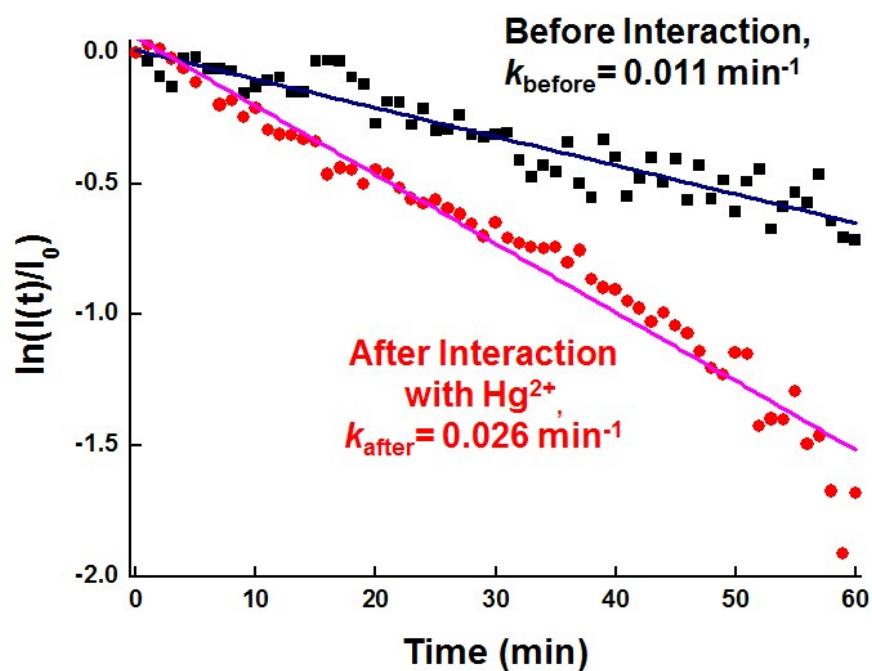

**Fig. S3.** Quantitative PL graph of log-intensity versus time and fitting kinetic data using Equation (2). PL kinetics and fitting graph of ssDNA-guided  $\text{Alq}_3$  rods before (black curve) and after interaction with mercury ions (red curve). PL spectra were analyzed with excitation by a 365 nm laser and emission at a 512 nm wavelength. Equation (2) is as follows:

$$\ln\left(\frac{I(t)}{I_0}\right) = -kt \quad (2)$$

which are governed by the kinetic decay constant  $k$  and initial fluorescence intensity  $I_0$ .

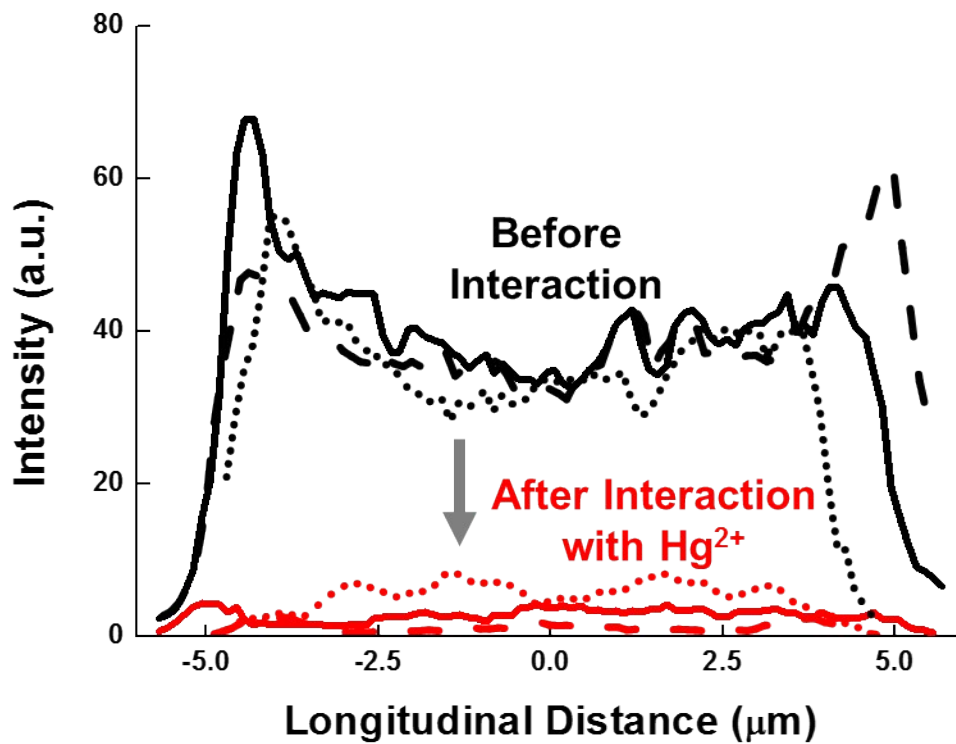

**Fig. S4.** The distinctive depression of luminescence of three different Alq<sub>3</sub> particles with thymine-rich ssDNA before and after interaction with mercury ions

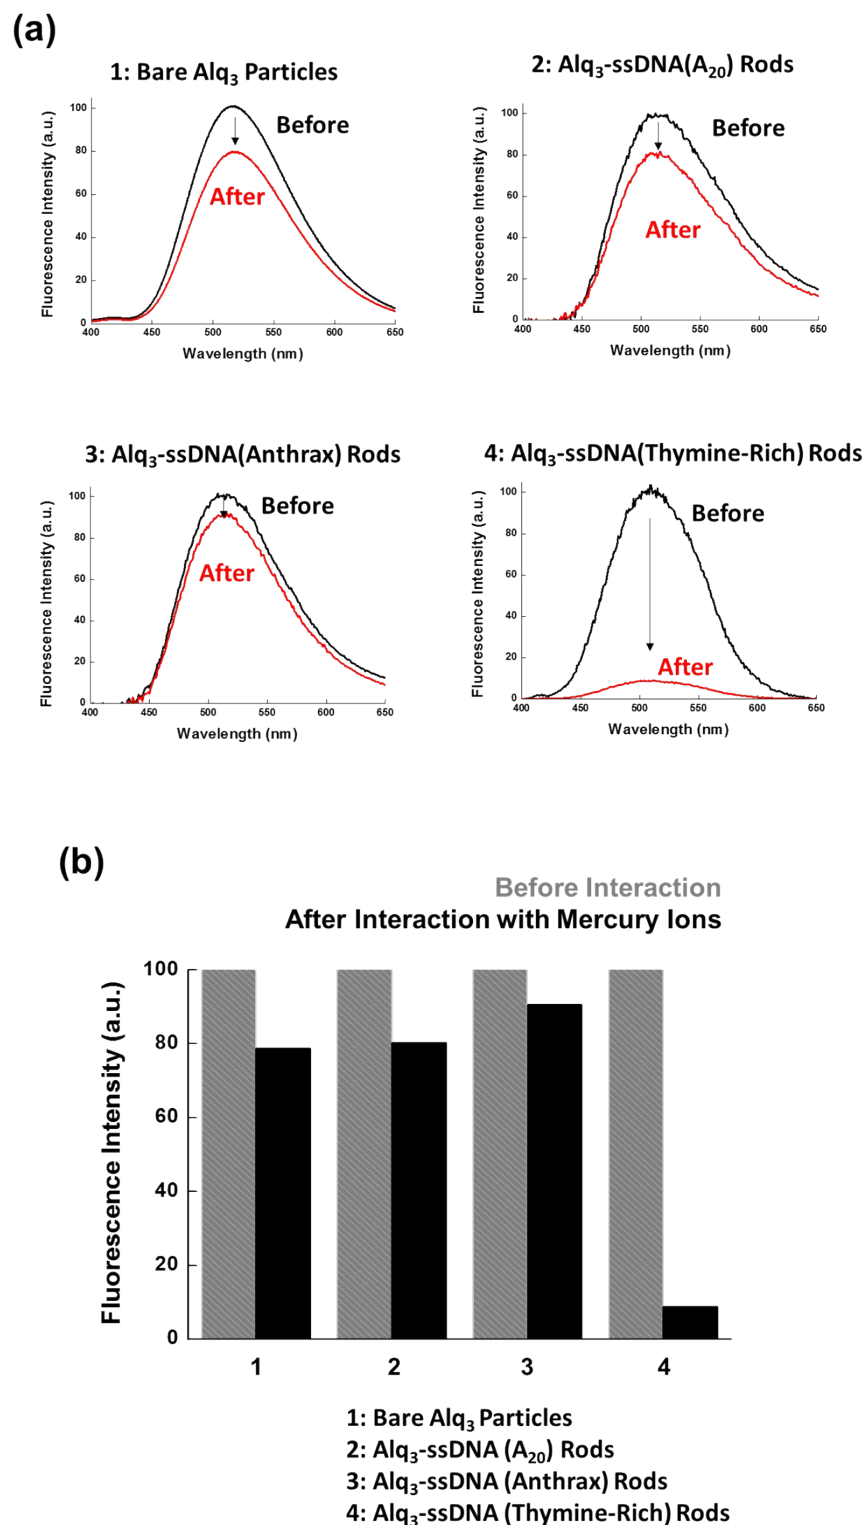

**Fig. S5.** Luminescence response of Alq<sub>3</sub> particles with three different sequences of ssDNA: (a) PL spectra and (b) quantitative PL intensities. The sequences of ssDNA(A<sub>20</sub>) and ssDNA(Anthrax) are 5'-AAAAAAAAAAAAAAAAAAAAA-3' and 5'-ATCCTTATCATTATTTAACAATAATCC-3', respectively.

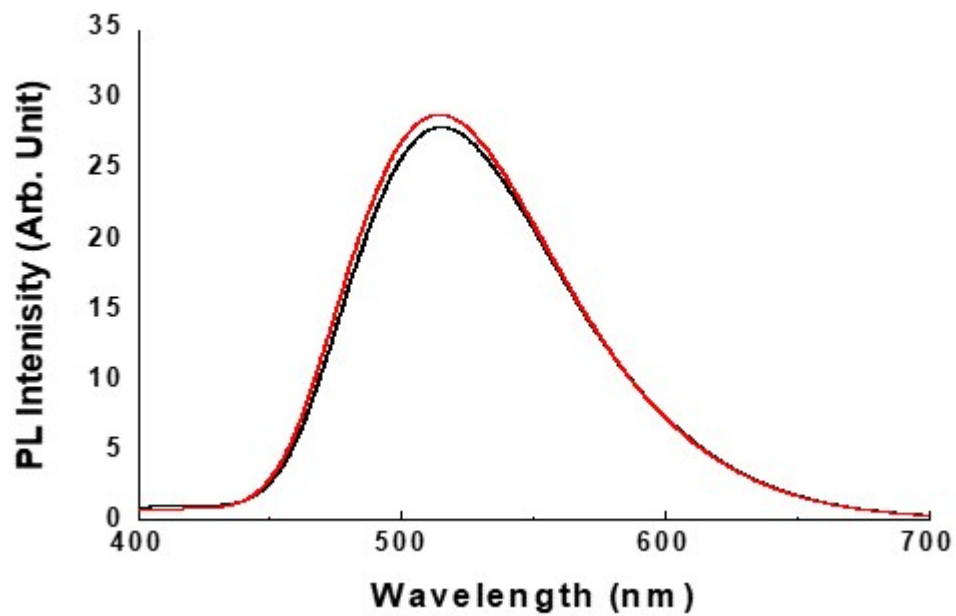

**Fig. S6.** PL spectra of the ssDNA-guided Alq<sub>3</sub> microrods incubated in D.I. water at 50°C for 30 min and then returned to room temperature. PL spectra of the Alq<sub>3</sub> rods before (black curve) and after thermal treatment at 50 °C for 30 min, followed by a return to room temperature (red curve). PL intensity of the Alq<sub>3</sub> rods persisted after thermal treatment at 50°C for 30 min.
